# Supplementary material for: Distinct epigenetic features of tumor-reactive CD8+ T cells in colorectal cancer patients revealed by genome-wide DNA methylation analysis
Source: PubMed Central journal article supplement (PMC6937914; doi:10.1186/s13059-019-1921-y), 2019-12-31
Supplement: 13059_2019_1921_MOESM1_ESM.pdf [file 13059_2019_1921_MOESM1_ESM.pdf]

# **Additional File 1**

## **Supplementary Materials**

**The file includes:**

Fig. S1-S8

Table S1

A

| Patient ID | Clinical Information |     |                   |       | Sequencing methods used |               |
|------------|----------------------|-----|-------------------|-------|-------------------------|---------------|
|            | Age                  | Sex | Location          | Stage | Smart-seq2              | Bisulfite-seq |
| P0929      | 58                   | M   | Right colon       | IIA   | ✓                       | ✓             |
| P1030      | 58                   | M   | Rectum            | IIB   | ✓                       | ✓             |
| P1031      | 79                   | F   | Colon sigmoideum  | IVA   | ✓                       | ✓             |
| P1101      | 81                   | F   | Colon transversum | IIIB  | ✓                       | ✓             |
| P1112      | 83                   | F   | Rectum            | I     | ✓                       | ✓             |
| P1113      | 83                   | F   | Colon sigmoideum  | IIIC  | ✓                       | ✓             |
| P1120      | 74                   | M   | Rectum            | I     | ✓                       | ✓             |
| P0117      | 60                   | F   | Right colon       | IIIB  | ✓                       | ✓             |

B

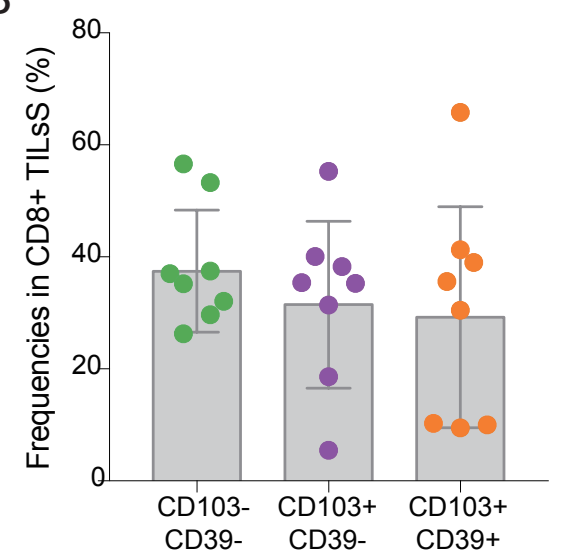

C

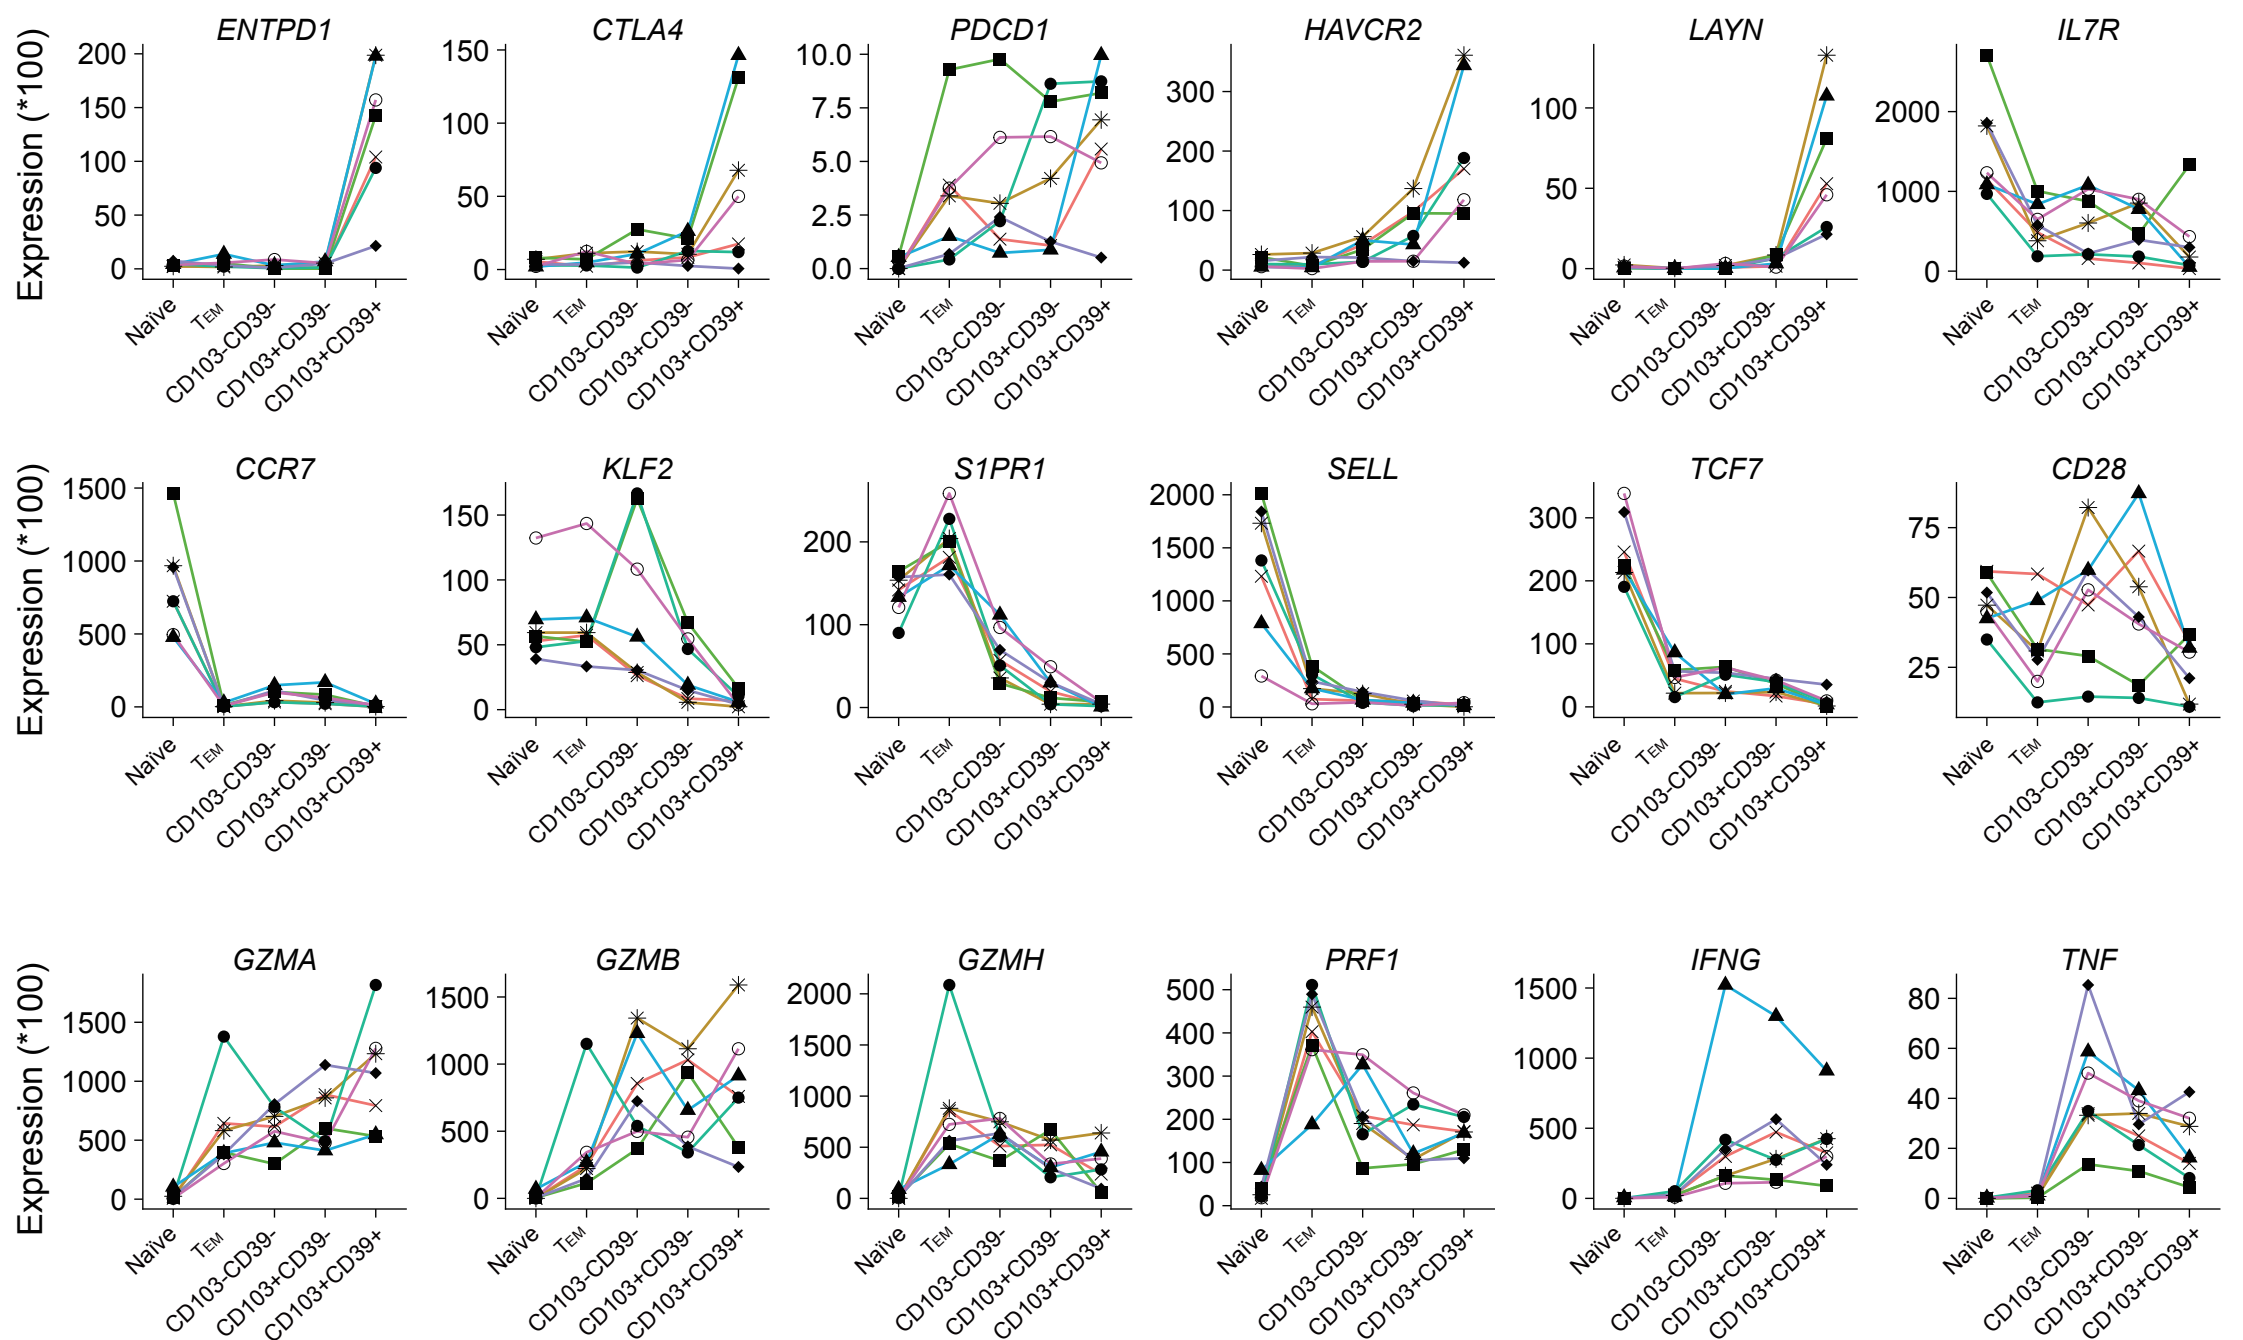

D

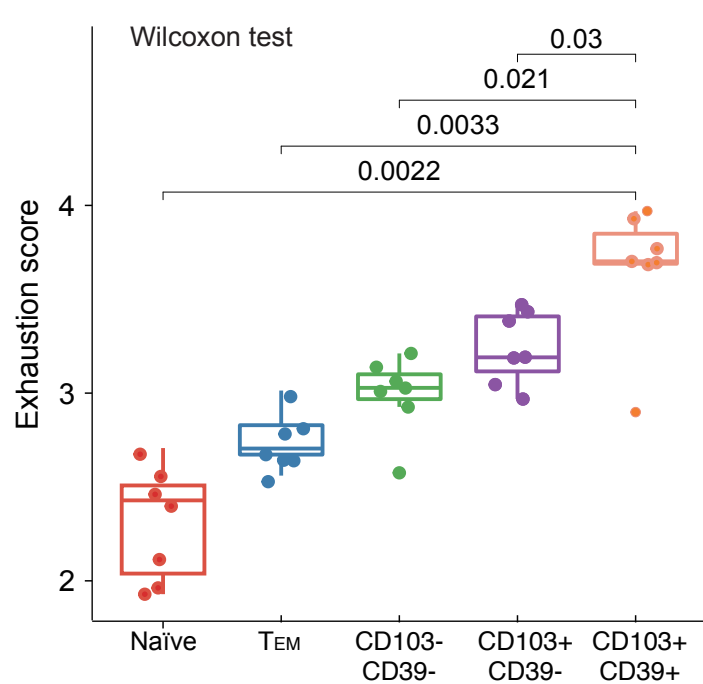

E

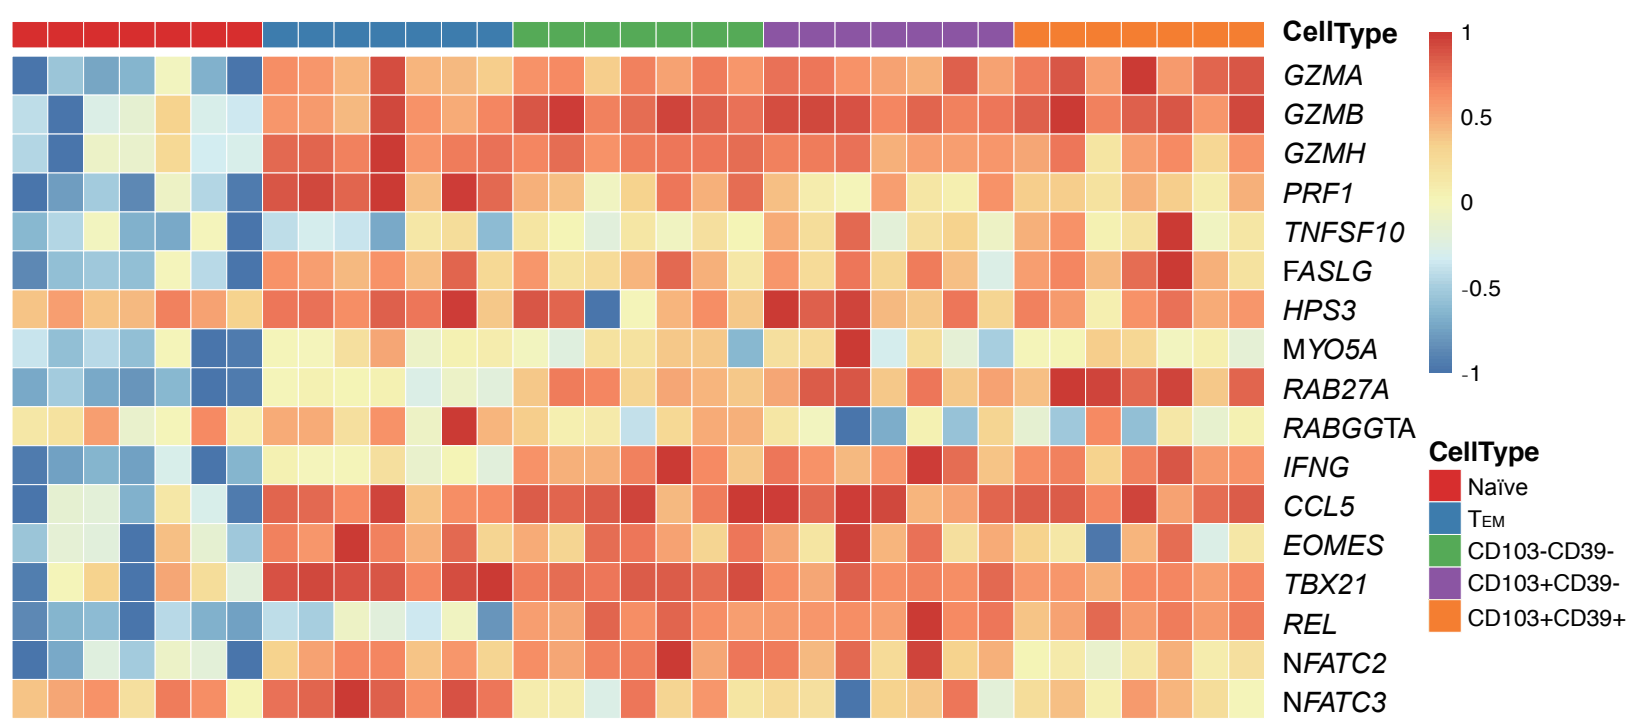

**Figure S1. Gene expression analysis revealed a distinct transcriptome of tumor-reactive CD8+ T subtype.** (A) The clinical information of CRC patients and sequencing methods used for each patient. (B) Frequencies of Three TIL subtypes in total CD8+ TILs for 8 CRC patients. (C) Examples of immune-related gene expression in five CD8+ T cell populations. Each symbol/line represents one patient, which is connected by a line. (D) Exhaustion levels of five CD8+ T cell populations were analyzed by Wilcoxon test. (E) Heat map displays expression of T<sub>EM</sub>-related genes in five CD8+ T cell populations.

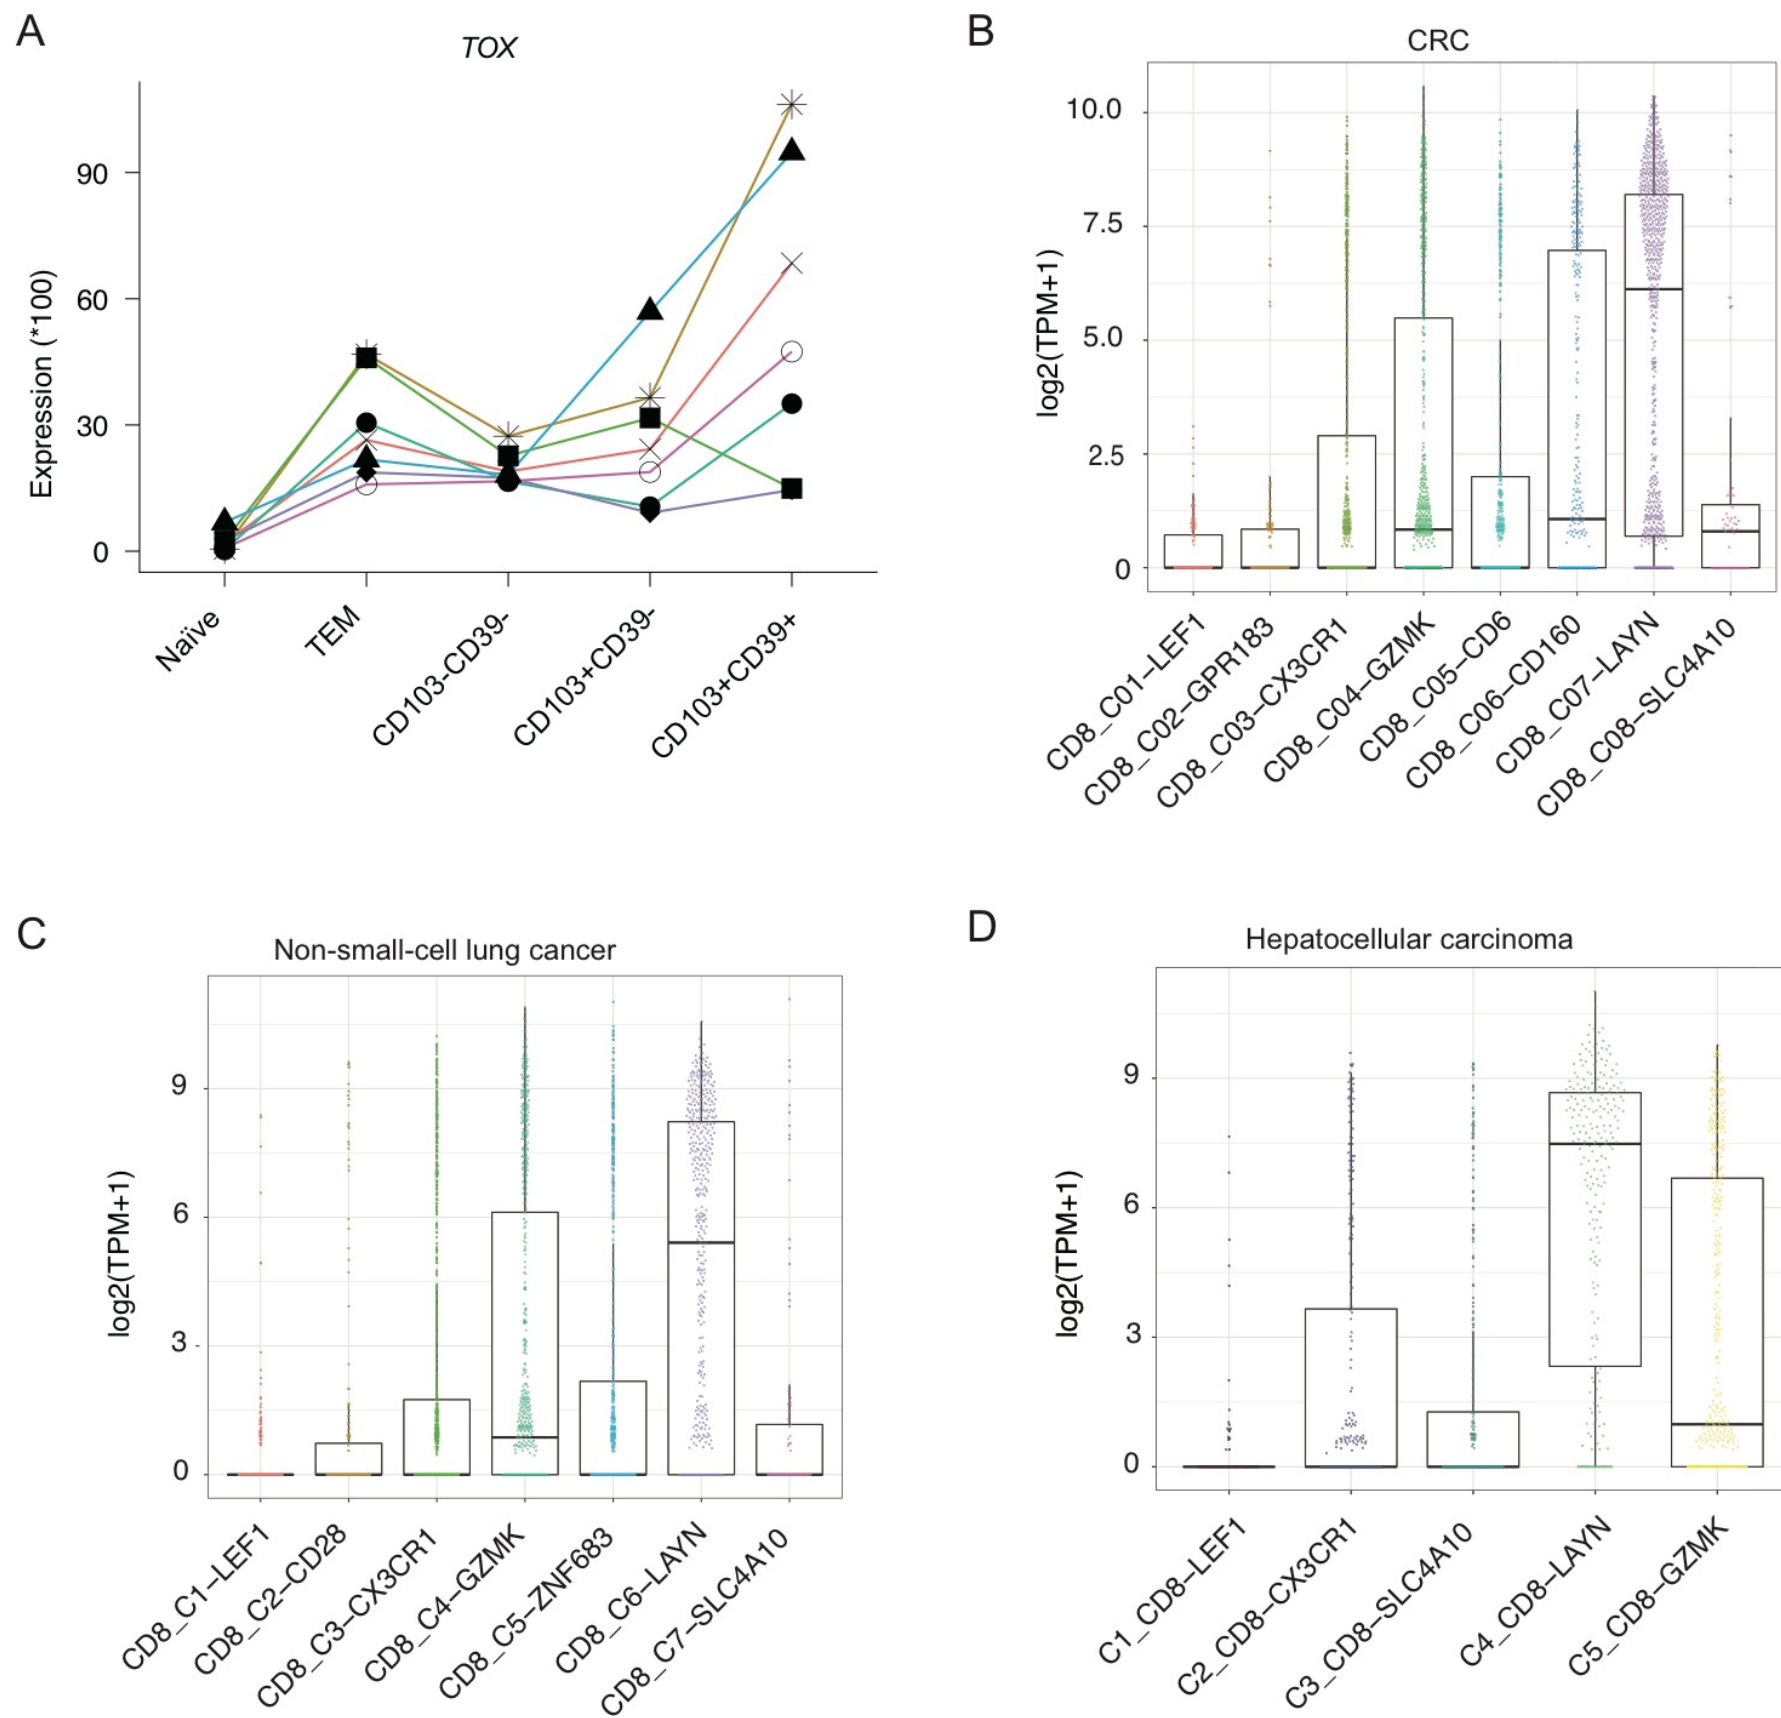

**Figure S2. *TOX* is induced in exhausted CD8+ T cells.** (A) RNA expression of *TOX* in five subtypes. (B-D) Box plots showing *TOX* expression profiles in different CD8+ T cell clusters from our previous scRNA-seq data of CD8+ T cells in (B) CRC, (C) non-small-cell lung cancer and (D) hepatocellular carcinoma, respectively. Notably, LAYN cluster represents exhausted CD8+ T cells.

A

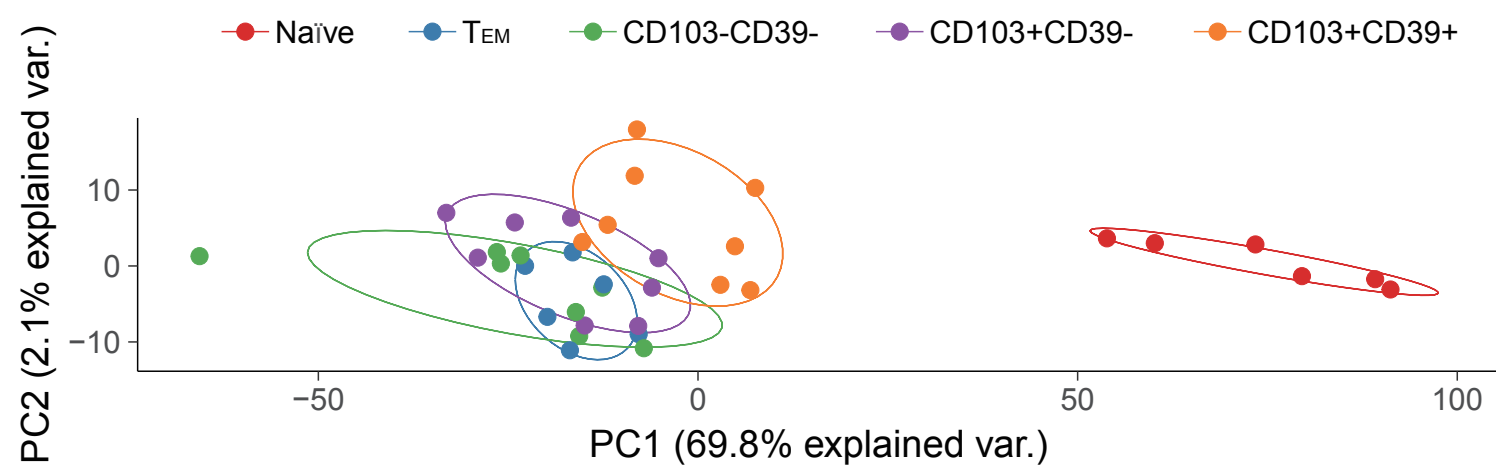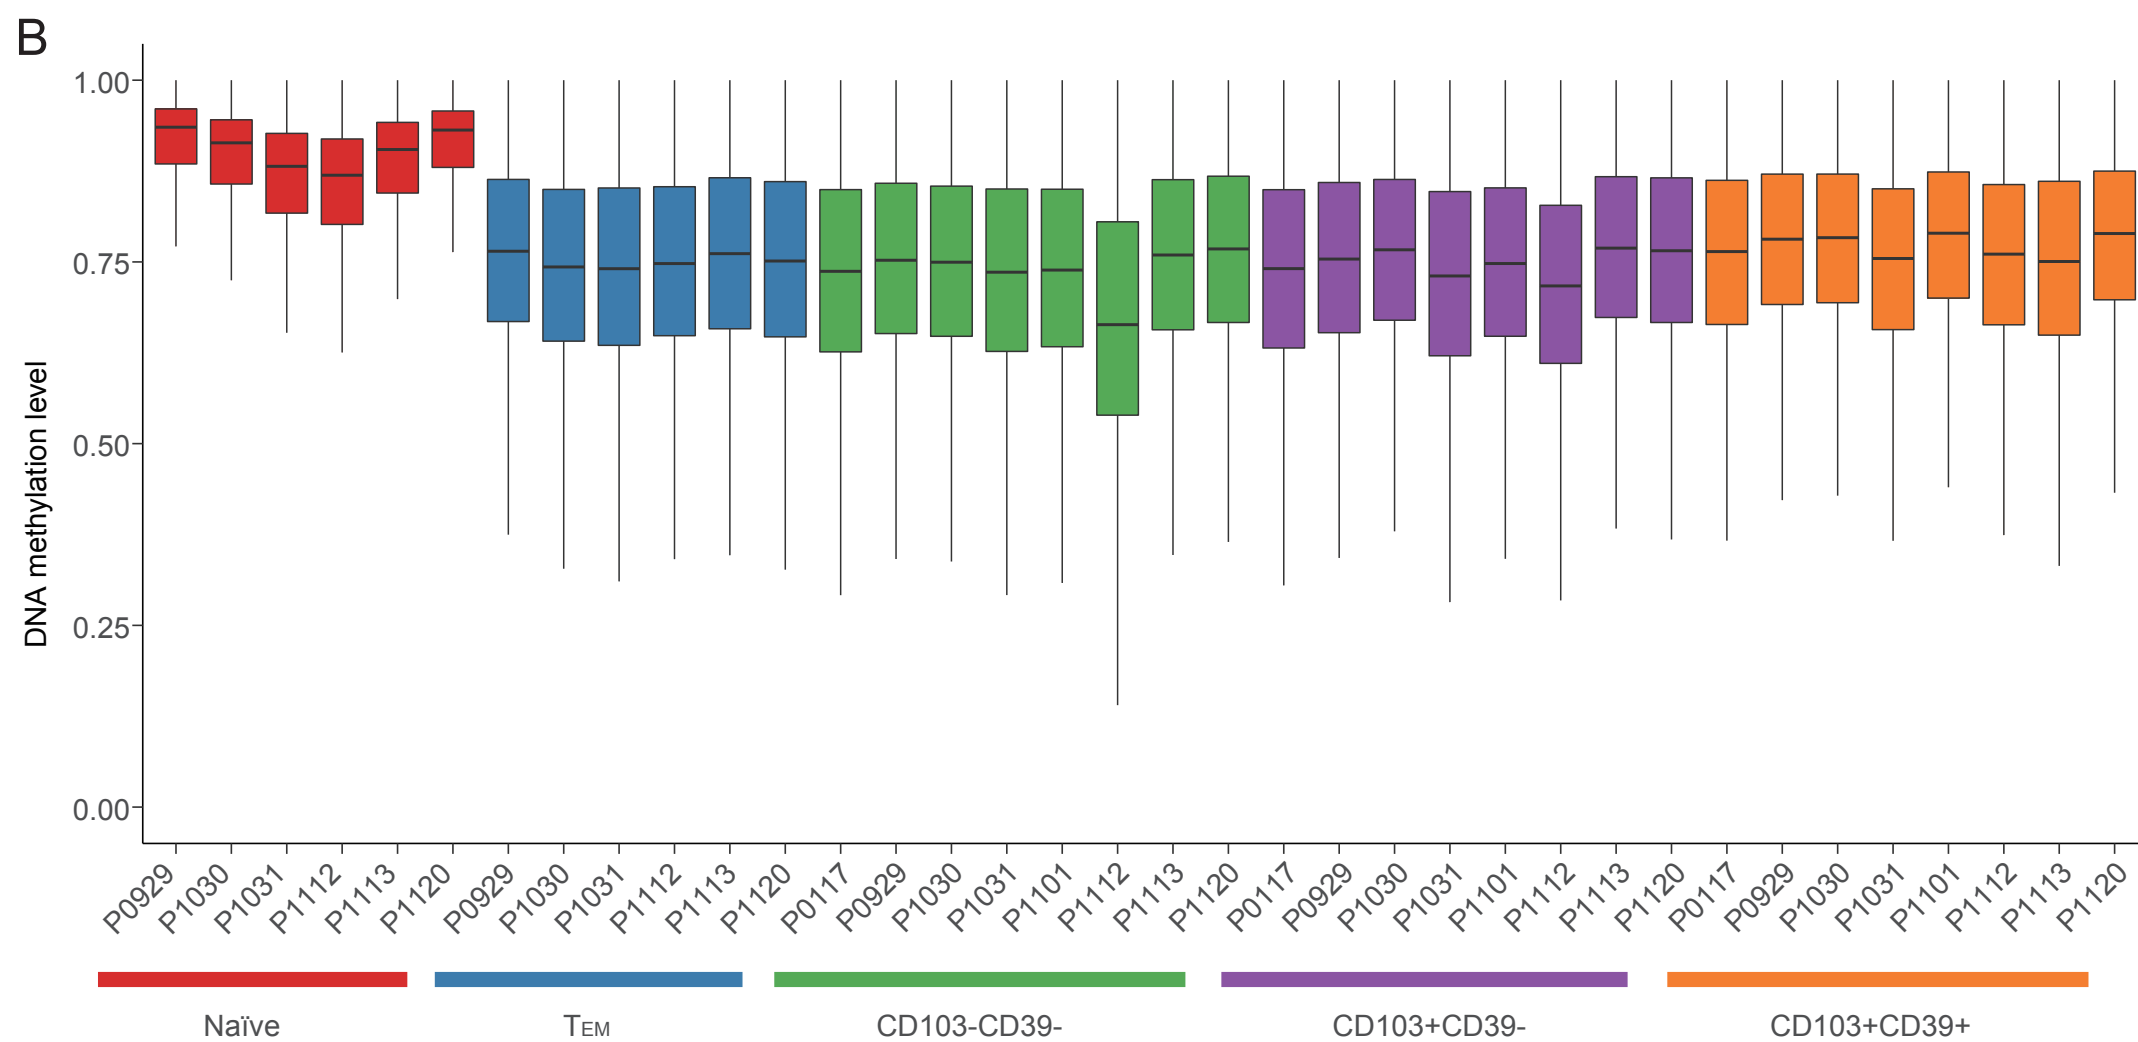

**Figure S3. Whole-Genome methylation profiling across multiple CD8+ T cell subtypes.** (A) PCA analysis based on methylation profiles of CD8+ T cells in five subtypes. (B) Box plots for the comparison of DNA methylation levels across five subtypes.

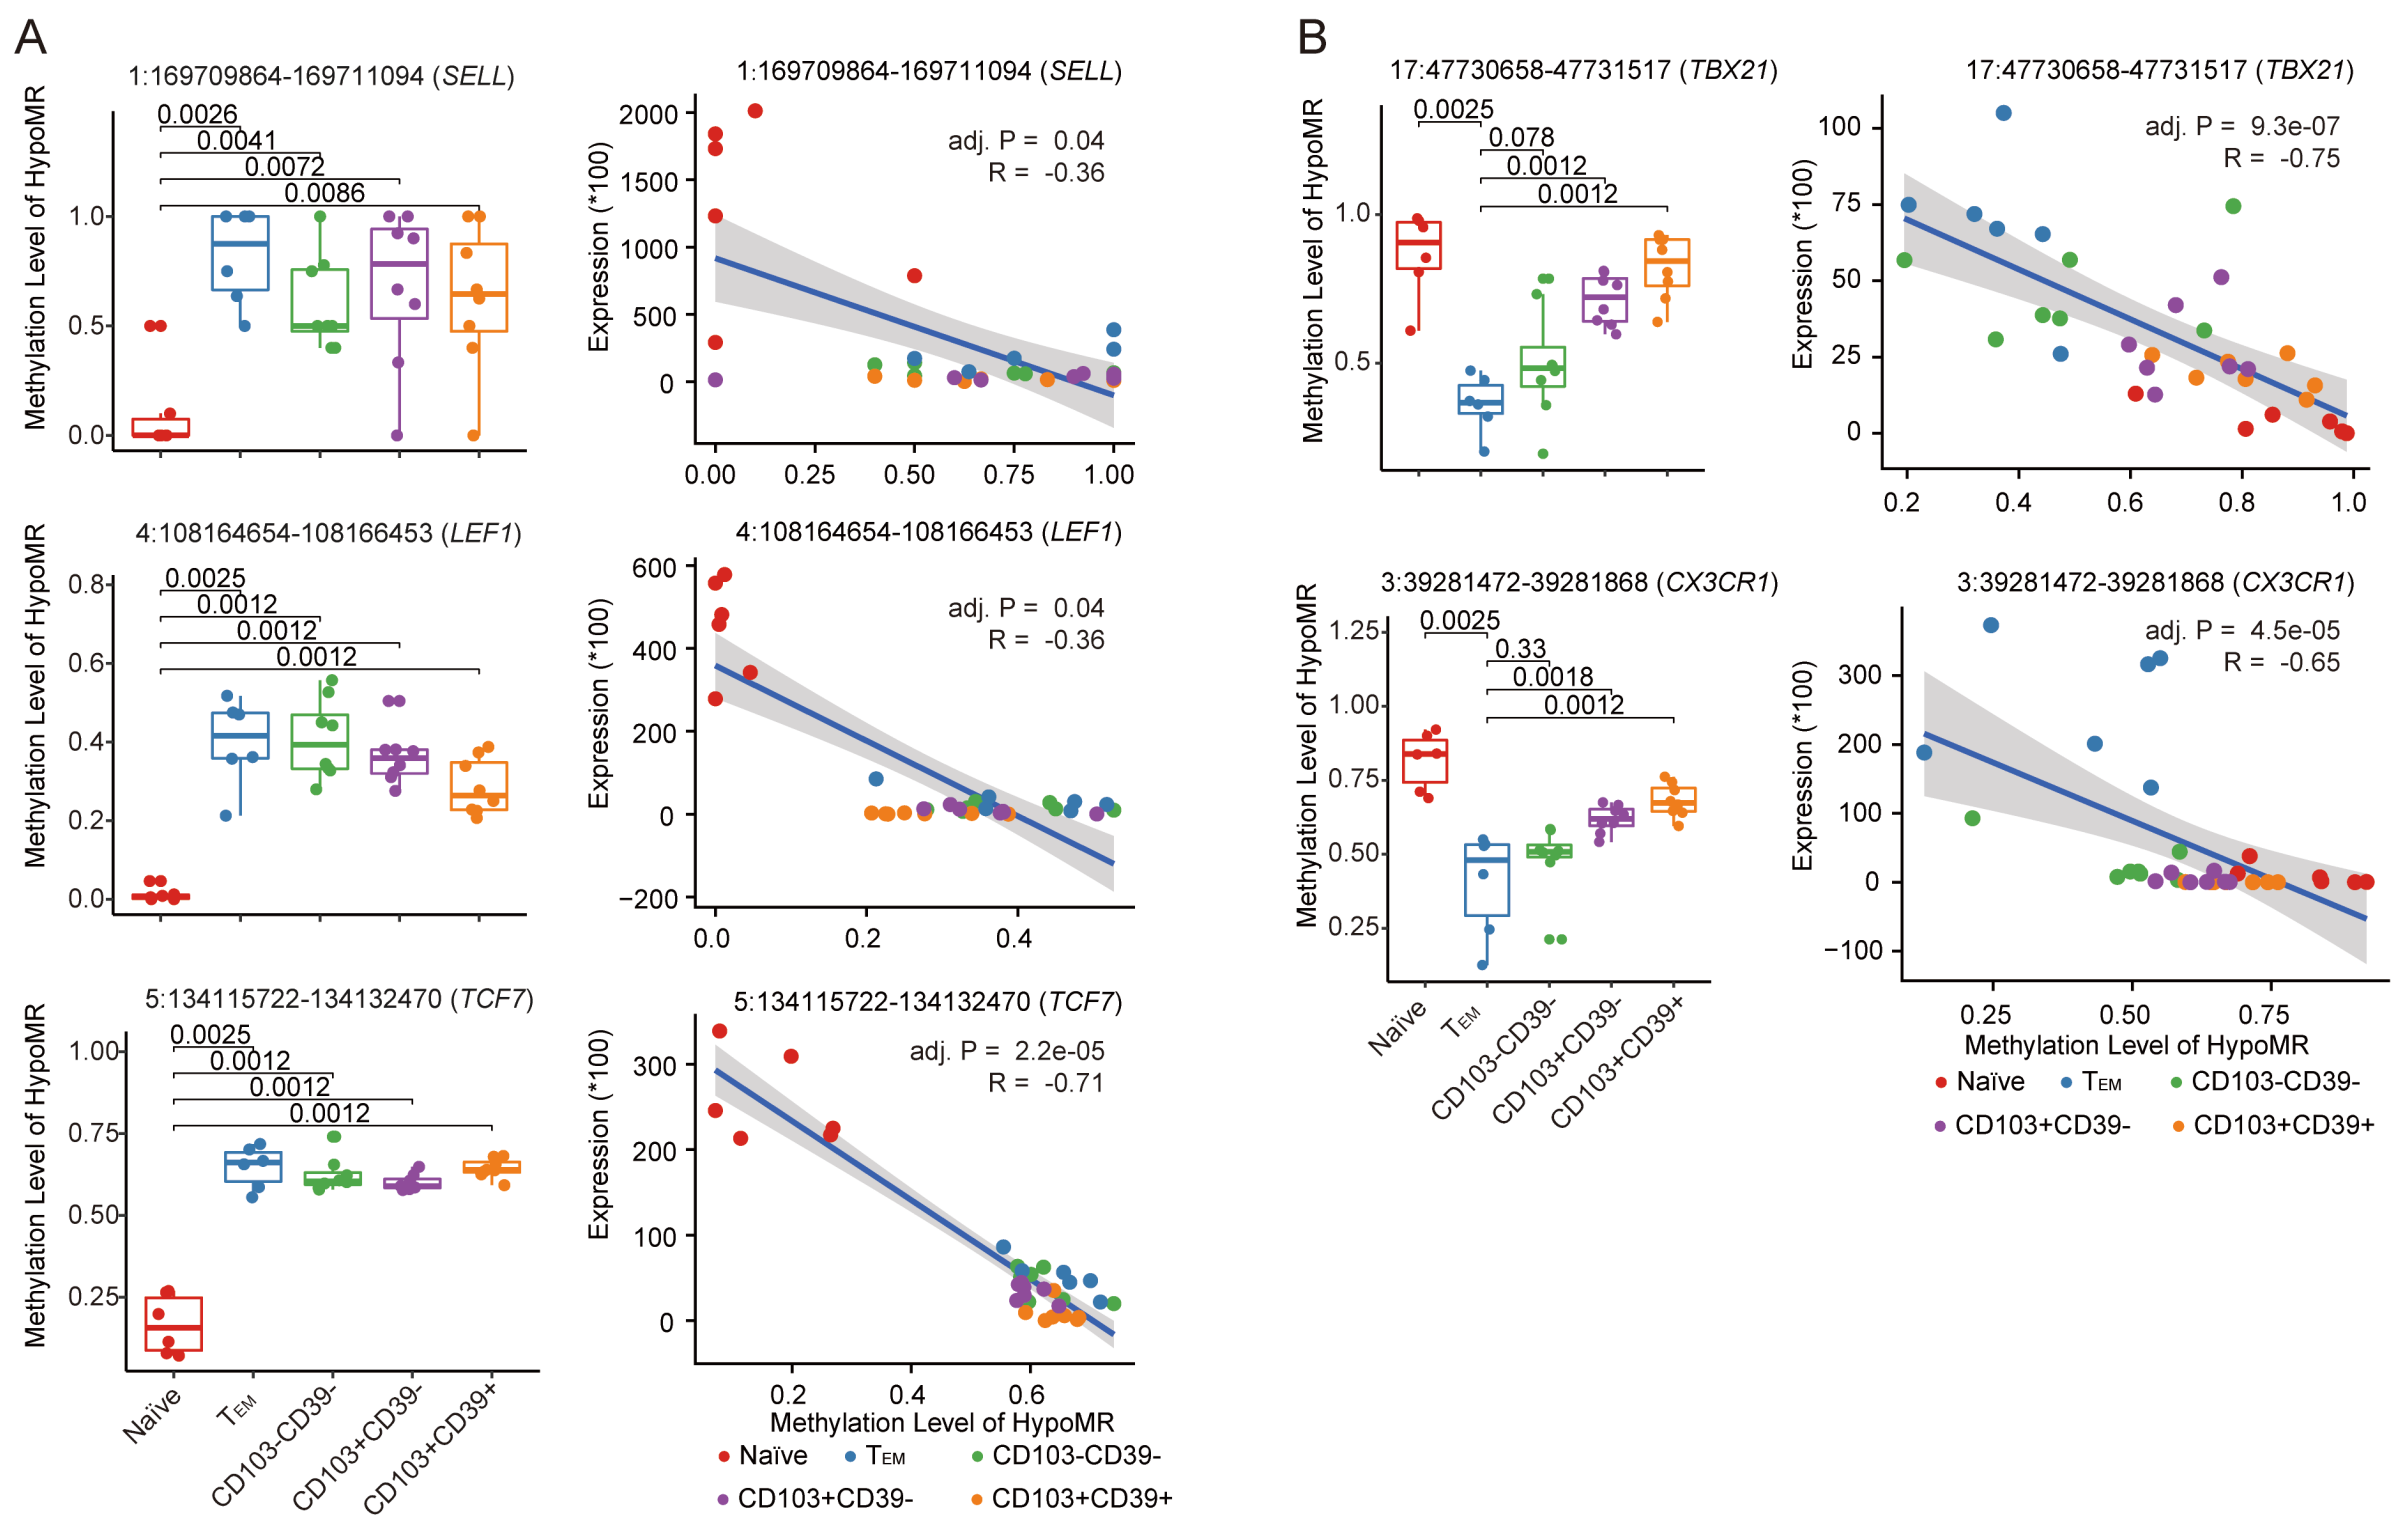

**Figure S4. The HypoMR methylation levels of representative genes in naïve and T<sub>EM</sub> CD8 T cells and their correlations with RNA expression levels across five populations. (A) Representative genes affected by HypoMRs in naïve CD8 T cells. The left panel showed the methylation level of specific HypoMR across the five T cell subtypes. One-tailed wilcoxon test was used to analyze the statistical significance between CD103+CD39+ subtype and other four subtypes. The right panel showed the correlation between RNA expression and HypoMR methylation level. adj.P: Benjamini-Hochberg adjusted p-value. R: regression coefficient. The title of each sub-figure was formatted as “chromosome:start-end(affected gene)”. (B) Representative genes affected by HypoMRs in T<sub>EM</sub> CD8 T cells. The left and right panels were the same as (A).**

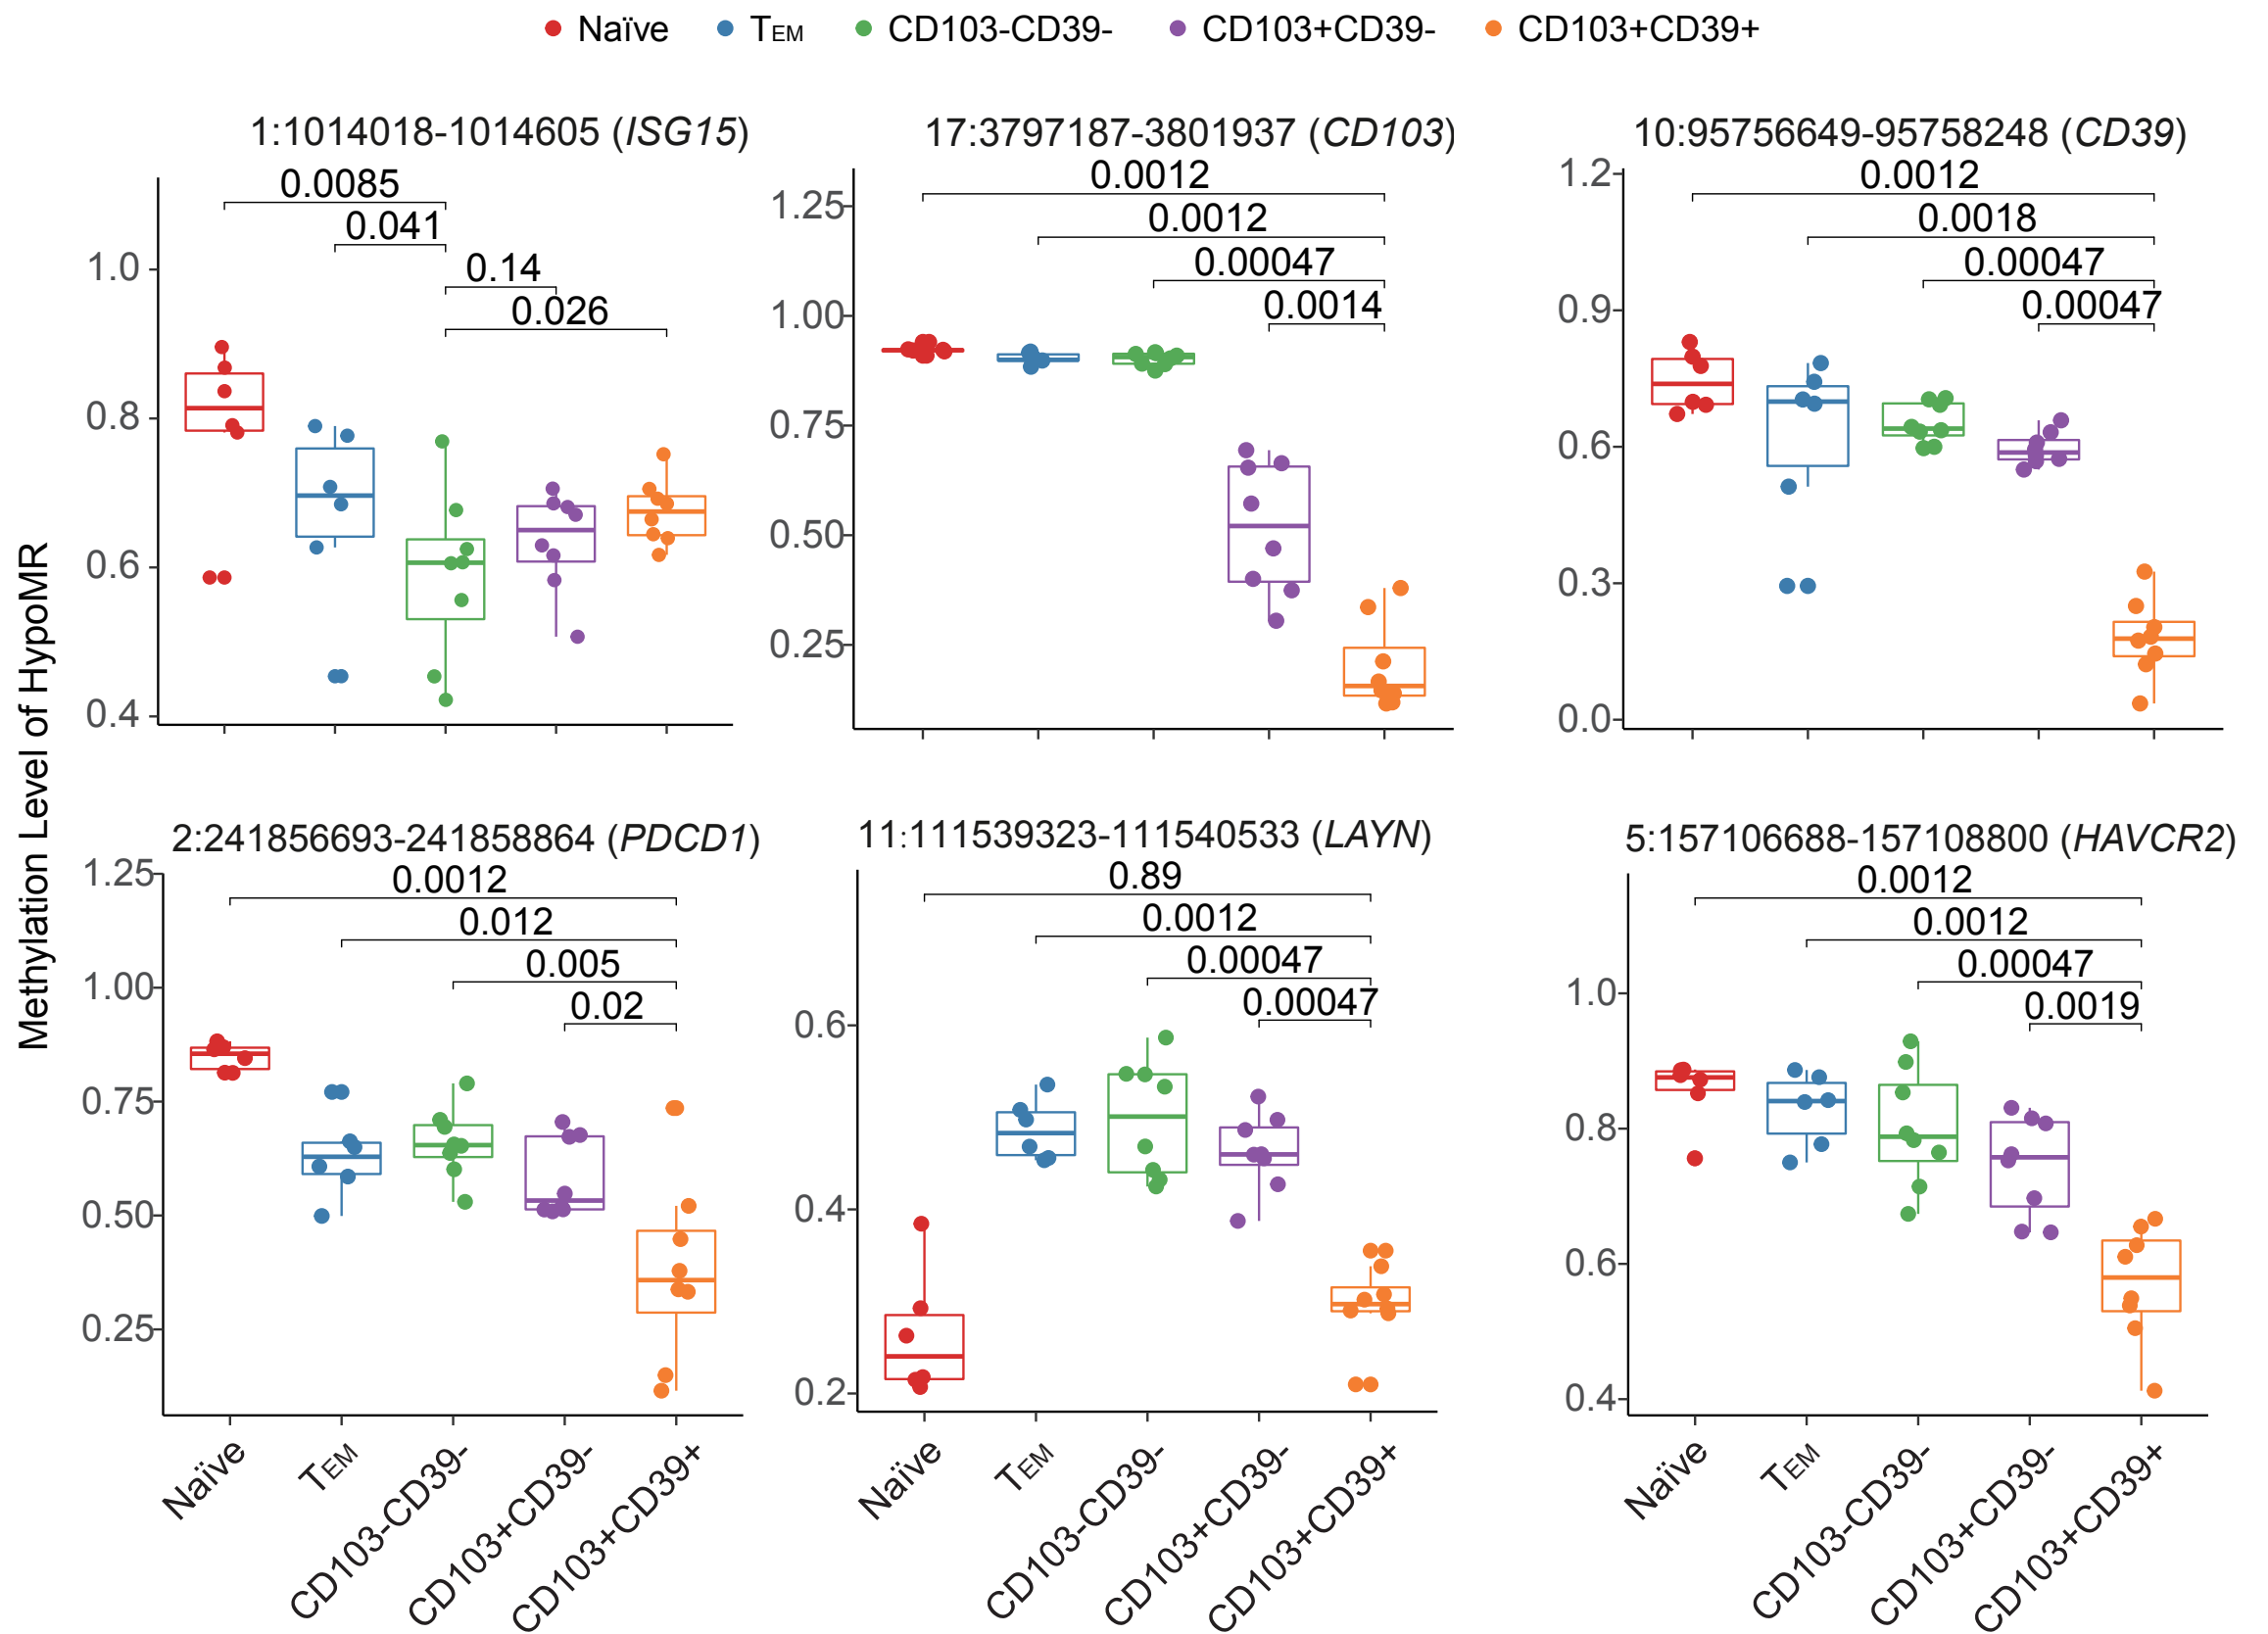

**Figure S5. The HypoMR methylation levels of of representative genes across five CD8 T cell populations.** One-tailed wilcoxon test was used to analyze the statistical significance between different subtypes. The title of each sub-figure was formatted as “chromosome:start-end(affected gene)”.



● Naïve ● T<sub>EM</sub> ● CD103-CD39- ● CD103+CD39- ● CD103+CD39+

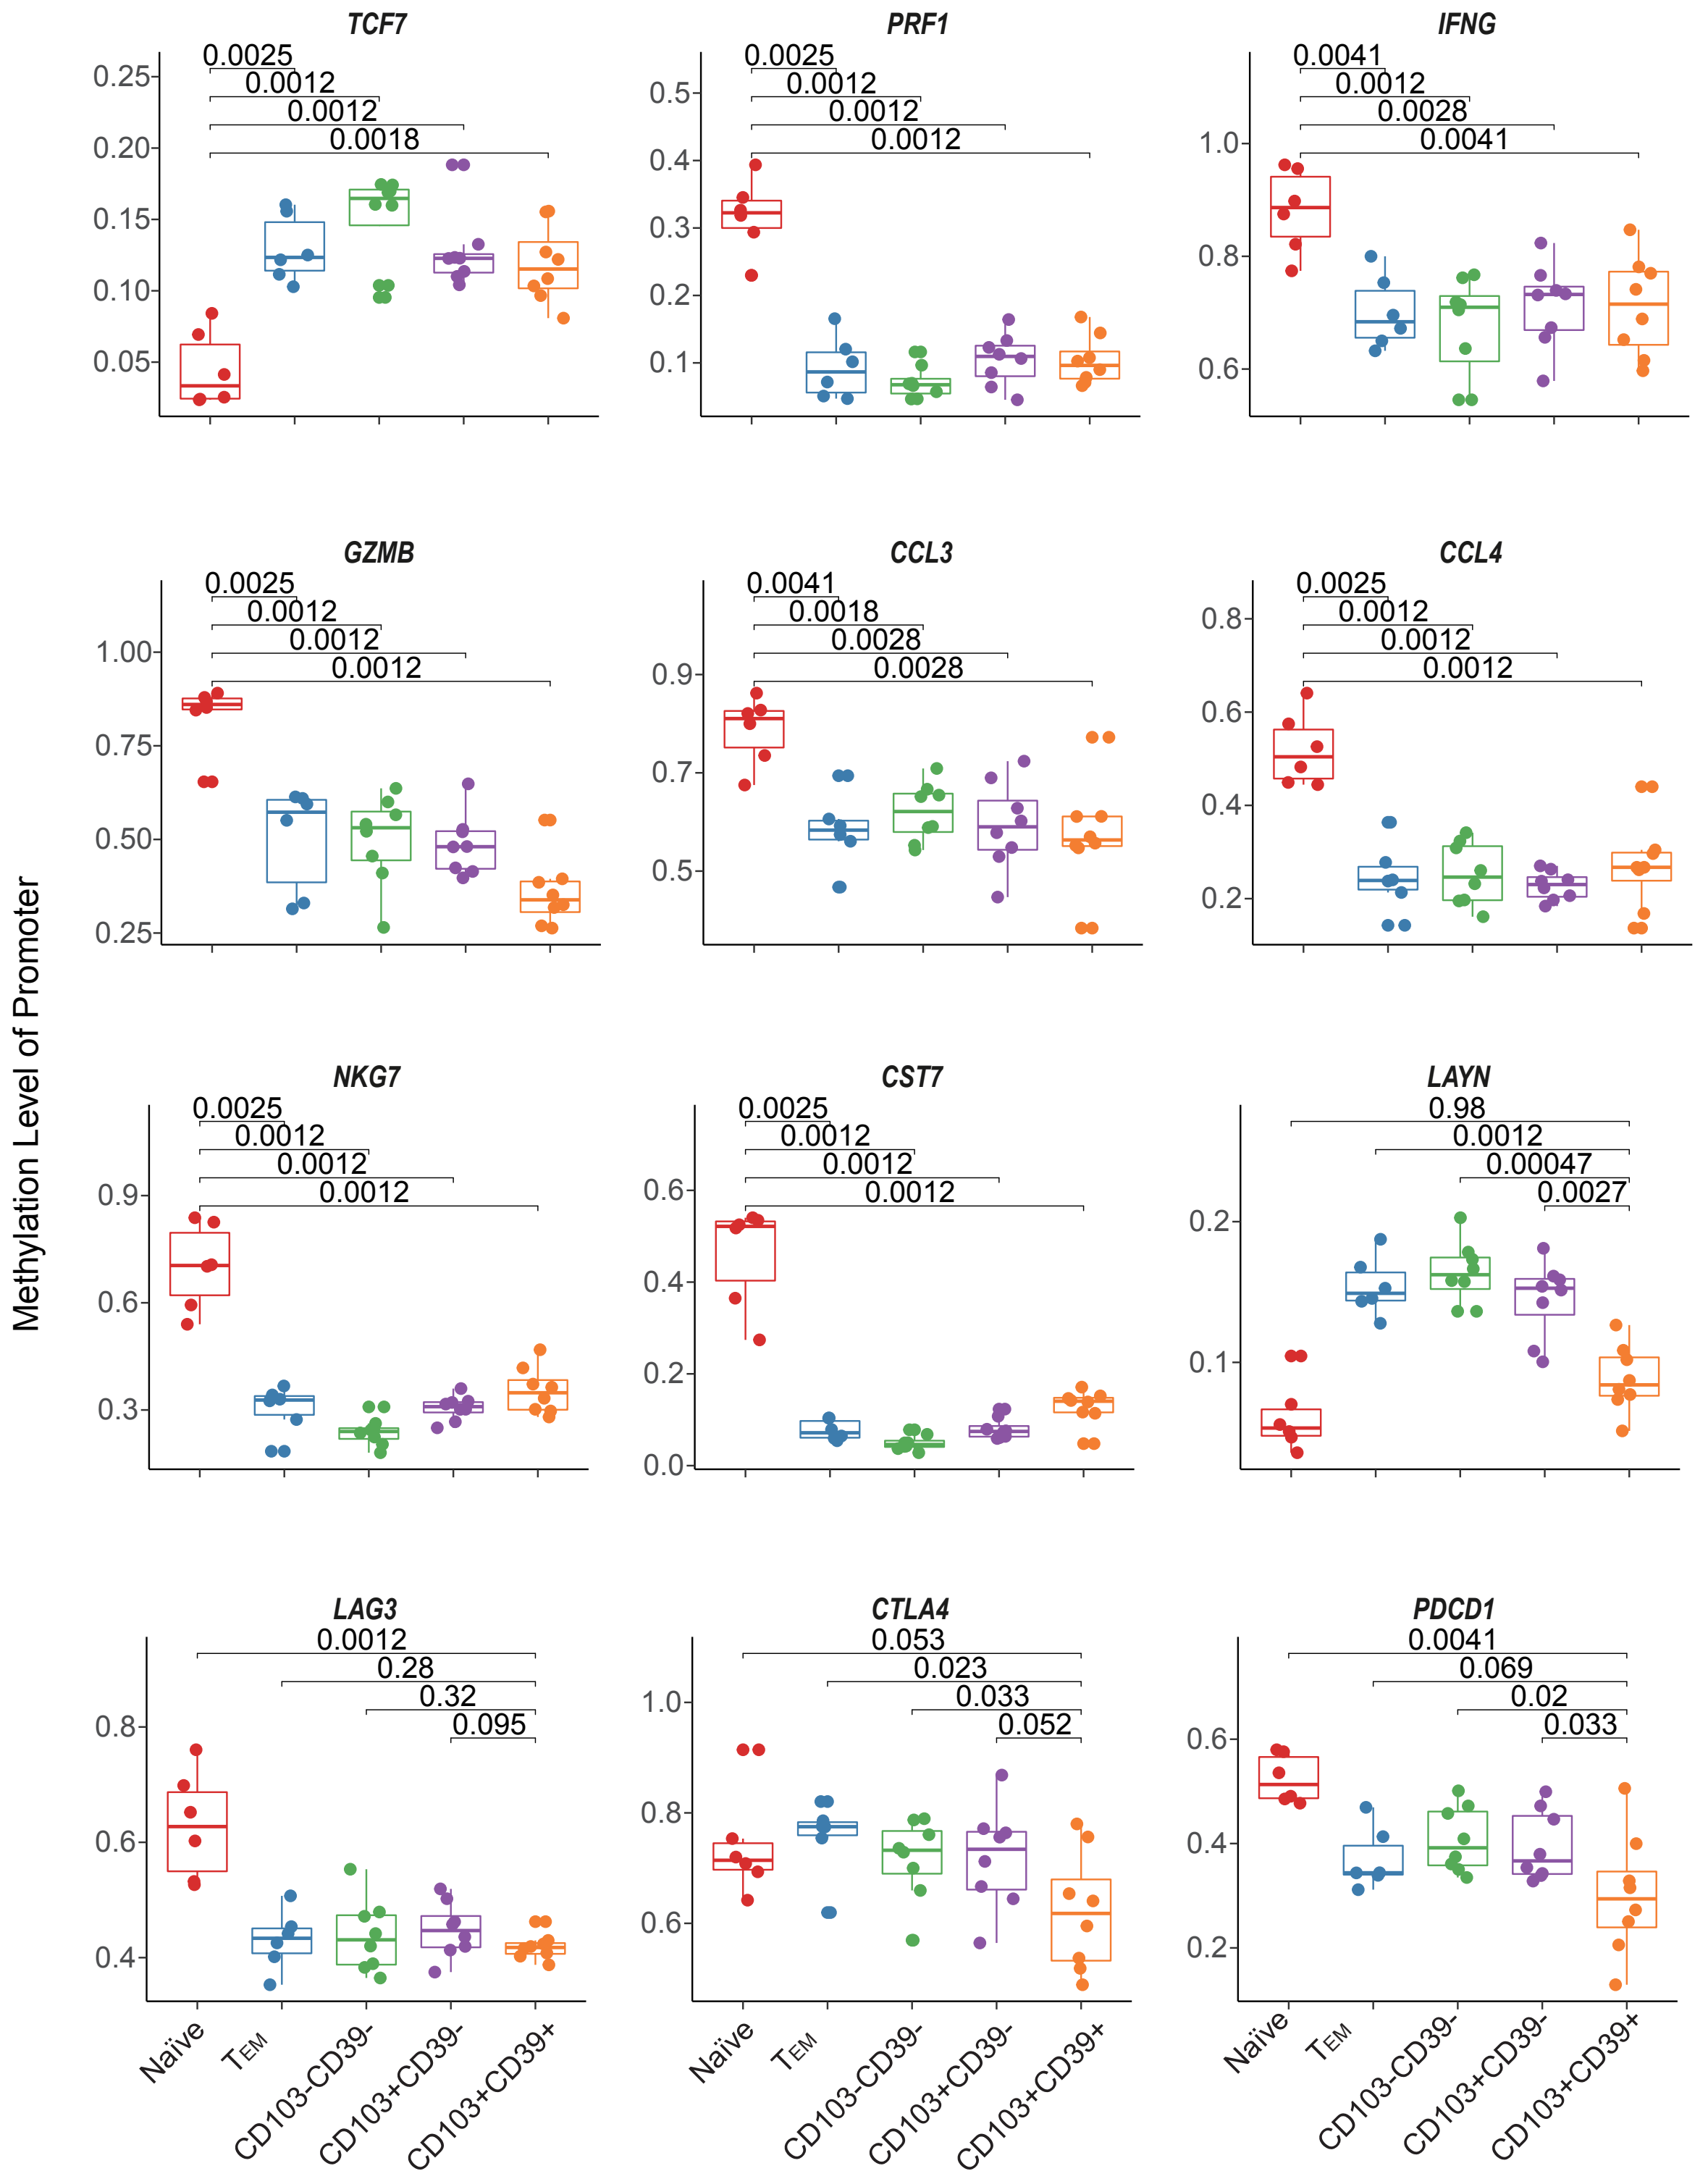



**Figure S6. The methylation levels of gene promoters across five CD8 T cell subtypes.** One-tailed wilcoxon test was used to analyze the statistical significance between different subtypes.

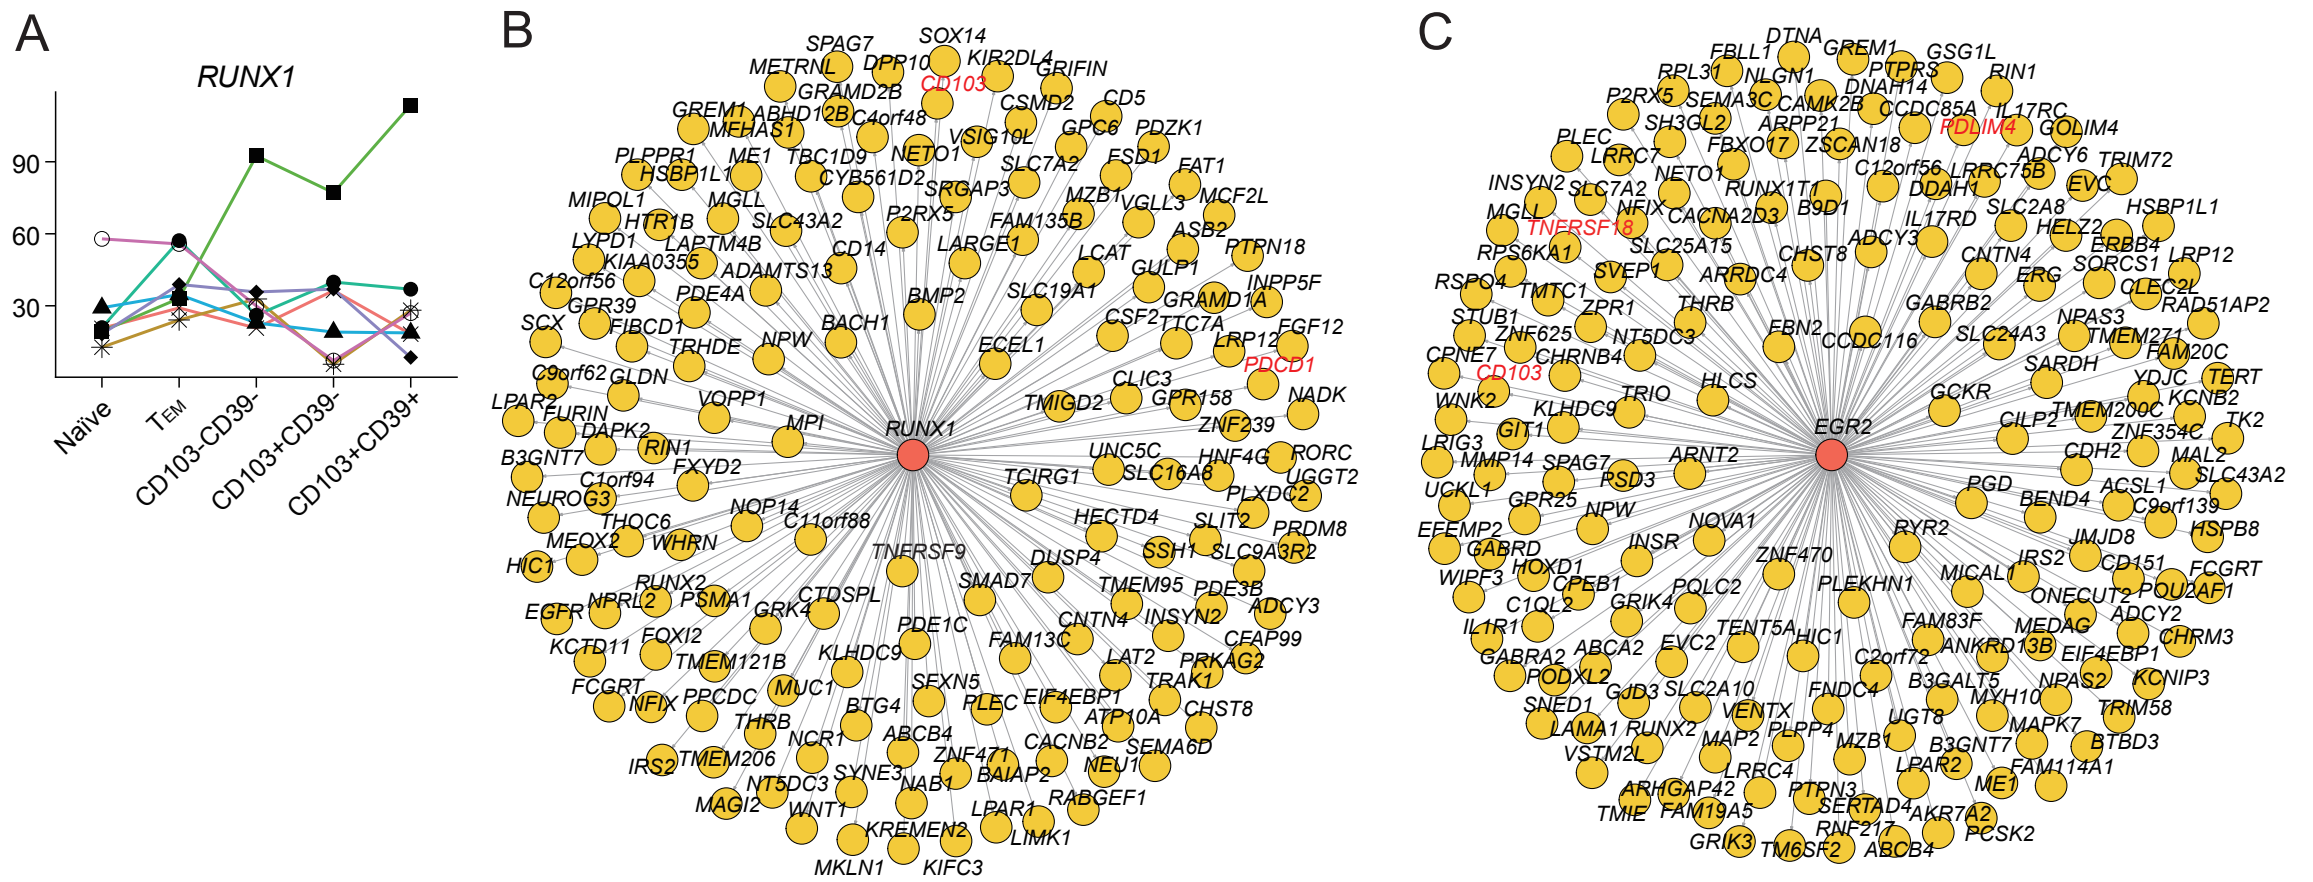

**Figure S7. Key transcription factors for CD103+CD39+ subtype.** (A) RNA expression of *RUNX1* in five subtypes. (B, C) Predicted targets of (B) *RUNX1* and (C) *EGR2* were displayed. Targets of interest were labeled in red.

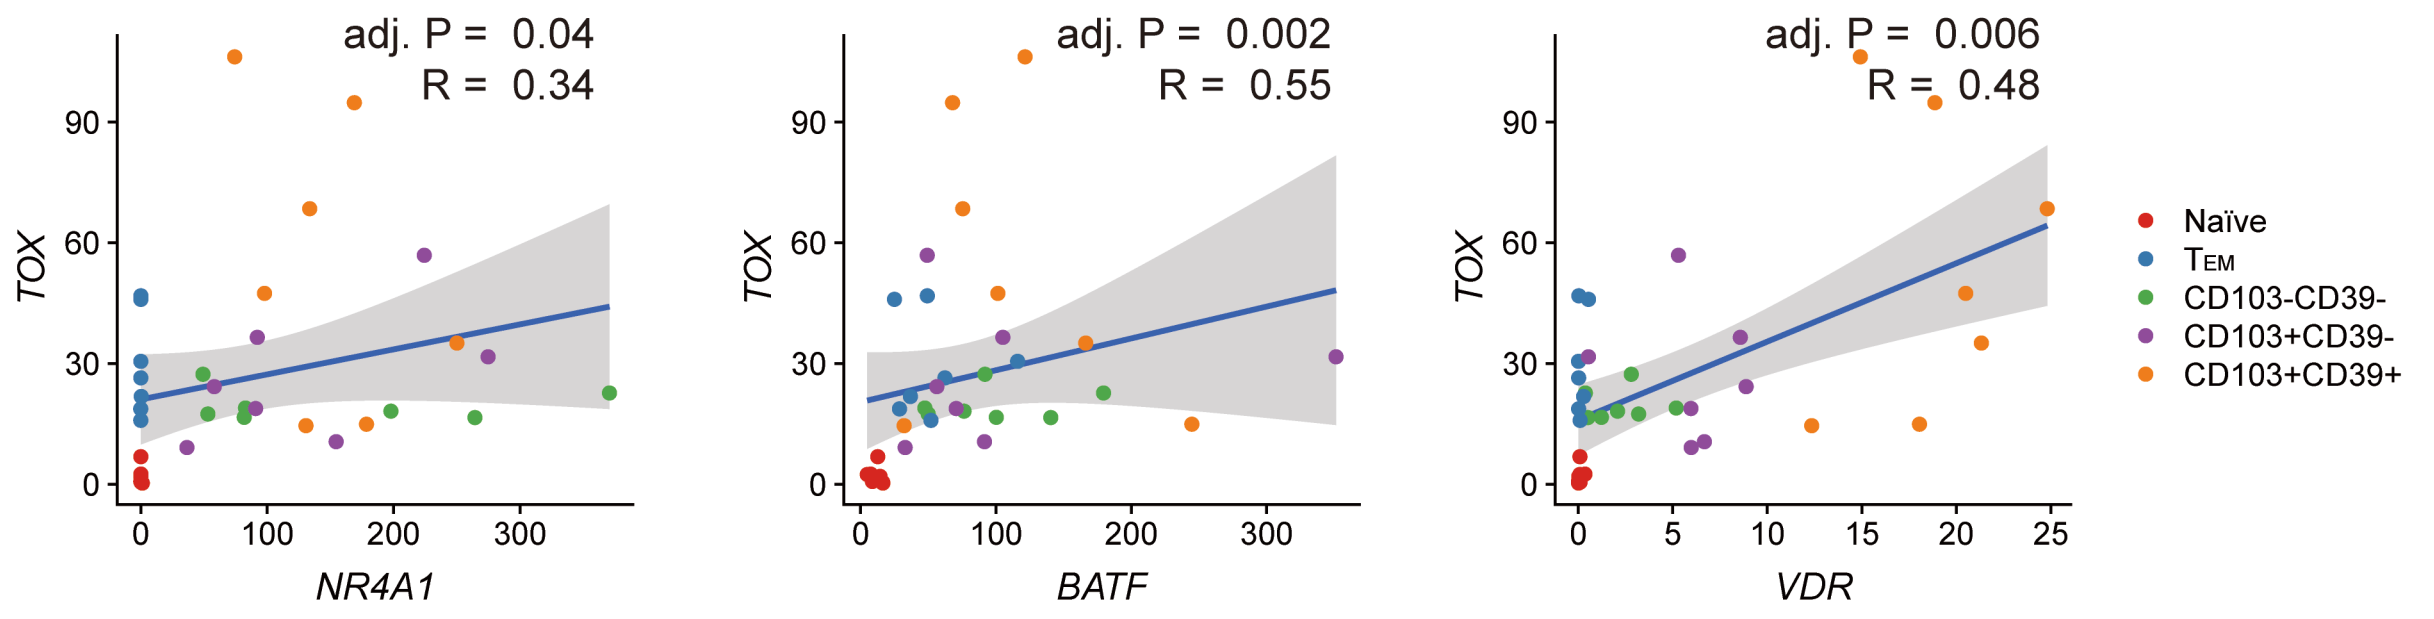

**Figure S8. Expression correlation of *TOX* and *NR4A1*, *BATF*, *VDR* in five CD8 T cell populations.**

median of covered CpG: 26624899  
 median of covered CpG by fraction: 0.451475

Naïve T cells  
 TEM T cells  
 CD103+CD39+  
 CD103+CD39-  
 CD103-CD39-

| Patient            | Sample             | Total_reads | Total_GB  | QC_Reads  | Mapped_reads | Mapped_ratio | non-CpG_bs | Lambda_bs | Covered_CpGs | Covered_frac |
|--------------------|--------------------|-------------|-----------|-----------|--------------|--------------|------------|-----------|--------------|--------------|
| P0929              | P1-1_L23_A003      | 144857804   | 21.73     | 143481270 | 35819145     | 24.96        | 0.985187   | 0.996325  | 25316945     | 0.429297     |
|                    | P1-2_L23_A008      | 160369528   | 24.06     | 158211594 | 37827232     | 23.91        | 0.98311    | 0.996198  | 25753434     | 0.436698     |
|                    | P2-1_L23_A004      | 160807964   | 24.12     | 158727662 | 38278395     | 24.12        | 0.985238   | 0.996295  | 25691277     | 0.435647     |
|                    | P2-2_L23_A009      | 155499252   | 23.32     | 151361068 | 41227040     | 27.24        | 0.989246   | 0.996307  | 27288506     | 0.462731     |
|                    | P3-1_L23_A005      | 189868220   | 28.48     | 187244590 | 46906145     | 25.05        | 0.986103   | 0.996225  | 28680269     | 0.486329     |
|                    | P3-2_L23_A010      | 192858134   | 28.93     | 190085016 | 44595736     | 23.46        | 0.98534    | 0.996281  | 27795898     | 0.471329     |
|                    | P4-1_L23_A006      | 188797732   | 28.32     | 185918660 | 44008803     | 23.67        | 0.984573   | 0.996225  | 27314056     | 0.463162     |
|                    | P4-2_L23_A011      | 165394086   | 24.81     | 161737006 | 39372608     | 24.34        | 0.986713   | 0.996426  | 26624899     | 0.451475     |
|                    | P5-1_L23_A007      | 222740972   | 33.41     | 219163612 | 55212634     | 25.19        | 0.986483   | 0.996293  | 31089377     | 0.52718      |
| P5-2_L23_A012      | 207165724          | 31.07       | 203526662 | 47519057  | 23.35        | 0.986125     | 0.996299   | 28950498  | 0.49091      |              |
| P1030              | P1030-1-1-1_HTWG7C | 179180718   | 26.88     | 174024106 | 26432757     | 15.19        | 0.975764   | 0.995501  | 22246378     | 0.377229     |
|                    | P1030-1-2-1_HTWG7C | 243923314   | 36.59     | 234993222 | 37748251     | 16.06        | 0.975639   | 0.995367  | 26688835     | 0.452558     |
|                    | P1030-1-3-1_HTWG7C | 206318860   | 30.95     | 197070662 | 32507057     | 16.5         | 0.9757     | 0.995482  | 24969435     | 0.423406     |
|                    | P1030-1-4-1_HTWG7C | 228038518   | 34.21     | 219510606 | 32381554     | 14.75        | 0.970754   | 0.995452  | 24810411     | 0.420707     |
|                    | P1030-1-5-1_HTWG7C | 201846596   | 30.28     | 192649544 | 30755469     | 15.96        | 0.971685   | 0.995513  | 24174702     | 0.409926     |
|                    | P1030-2-1-2_HTWG7C | 237259734   | 35.59     | 223781384 | 32813064     | 14.66        | 0.976926   | 0.993604  | 24515052     | 0.415699     |
|                    | P1030-2-2-2_HTWG7C | 287206650   | 43.08     | 271876786 | 39648695     | 14.58        | 0.977548   | 0.993422  | 26787026     | 0.454222     |
|                    | P1030-2-3-2_HTWG7C | 285058550   | 42.76     | 264491812 | 41476278     | 15.68        | 0.980722   | 0.993605  | 27671885     | 0.469226     |
|                    | P1030-2-4-2_HTWG7C | 224148840   | 33.62     | 205613538 | 32804166     | 15.95        | 0.980194   | 0.993729  | 24443574     | 0.414486     |
|                    | P1030-2-5-2_HTWG7C | 204455744   | 30.67     | 180633362 | 26208704     | 14.51        | 0.976197   | 0.993073  | 21632656     | 0.366821     |
|                    | P1030-3-1-3_HTWG7C | 243894334   | 36.58     | 235889000 | 40119826     | 17.01        | 0.977359   | 0.995533  | 27689832     | 0.469531     |
|                    | P1030-3-2-3_HTWG7C | 266111622   | 39.92     | 256195768 | 44781917     | 17.48        | 0.978338   | 0.995494  | 29034828     | 0.492339     |
|                    | P1030-3-3-3_HTWG7C | 253536002   | 38.03     | 244652982 | 40128840     | 16.4         | 0.977528   | 0.995534  | 27975490     | 0.474377     |
| P1030-3-4-3_HTWG7C | 214376246          | 32.16       | 205870062 | 34780240  | 16.89        | 0.978685     | 0.995402   | 25599763  | 0.43409      |              |
| P1030-3-5-3_HTWG7C | 196830880          | 29.52       | 183131452 | 33894297  | 18.51        | 0.980547     | 0.995266   | 25301285  | 0.42903      |              |
| P1031              | P1031-1-P1-1_HTGVK | 186765460   | 28.01     | 181080936 | 2454562      | 13.56        | 0.978987   | 0.993377  | 20658256     | 0.350301     |
|                    | P1031-1-P2-1_HTGVK | 222399864   | 33.36     | 215757764 | 30925016     | 14.33        | 0.975036   | 0.993439  | 23647530     | 0.40099      |
|                    | P1031-1-P3-1_HTGVK | 214769116   | 32.22     | 207718086 | 27318414     | 13.15        | 0.971912   | 0.99341   | 22230004     | 0.376954     |
|                    | P1031-1-P4-1_HTGVK | 238155942   | 35.72     | 232028242 | 29761976     | 12.83        | 0.969261   | 0.993491  | 22979693     | 0.389665     |
|                    | P1031-1-P5-1_HTGVK | 198387742   | 29.76     | 192542854 | 27626045     | 14.35        | 0.974132   | 0.993577  | 22230655     | 0.376968     |
|                    | P1031-2-P1-2_HTWG7 | 255724358   | 38.36     | 247849982 | 37281861     | 15.04        | 0.974197   | 0.994007  | 26297050     | 0.445916     |
|                    | P1031-2-P2-2_HTWG7 | 215396726   | 32.31     | 206860786 | 33343137     | 16.12        | 0.970856   | 0.994175  | 25224221     | 0.427728     |
|                    | P1031-2-P3-2_HTWG7 | 219463238   | 32.92     | 210620196 | 32542767     | 15.45        | 0.974446   | 0.994042  | 24877871     | 0.421849     |
|                    | P1031-2-P4-2_HTWG7 | 166269210   | 24.94     | 157369478 | 23663822     | 15.04        | 0.974359   | 0.994165  | 20591649     | 0.349169     |
|                    | P1031-2-P5-2_HTWG7 | 219819942   | 32.97     | 208637178 | 32545100     | 15.6         | 0.973782   | 0.99407   | 24535877     | 0.416048     |
|                    | P1031-3-P1-3_HTGVK | 285920448   | 42.89     | 275119678 | 43575495     | 15.84        | 0.977364   | 0.994269  | 28726383     | 0.487111     |
|                    | P1031-3-P2-3_HTGVK | 221728678   | 33.26     | 212162626 | 32888575     | 15.5         | 0.977707   | 0.994259  | 25175998     | 0.426904     |
|                    | P1031-3-P3-3_HTGVK | 234868086   | 35.23     | 219986554 | 33596020     | 15.27        | 0.975916   | 0.994092  | 25075563     | 0.425205     |
|                    | P1031-3-P4-3_HTGVK | 198136754   | 29.72     | 187116002 | 30135799     | 16.11        | 0.978597   | 0.994147  | 23659312     | 0.401188     |
|                    | P1031-3-P5-3_HTGVK | 177753906   | 26.66     | 169211880 | 28466741     | 16.82        | 0.979439   | 0.994206  | 22850387     | 0.387474     |
| P1101              | P3-1_L4_A008       | 233050326   | 34.96     | 218998162 | 35386841     | 16.16        | 0.987724   | 0.994789  | 26508593     | 0.449509     |
|                    | P3-2_L3_A010       | 335491570   | 50.32     | 315955066 | 32221393     | 10.2         | 0.979048   | 0.994939  | 24529359     | 0.415946     |
|                    | P3-3_L2_A009       | 278435562   | 41.77     | 244080018 | 31521419     | 12.91        | 0.974932   | 0.987718  | 22217071     | 0.376735     |
|                    | P4-1_L4_A009       | 332620464   | 49.89     | 308180738 | 46639119     | 15.13        | 0.98615    | 0.99483   | 29885556     | 0.506767     |
|                    | P4-2_L3_A011       | 336890966   | 50.53     | 318188084 | 34689128     | 10.9         | 0.980846   | 0.995197  | 25804696     | 0.43757      |
|                    | P4-3_L2_A011       | 249155338   | 37.37     | 227001400 | 24749148     | 10.9         | 0.972928   | 0.988586  | 19325543     | 0.327704     |
|                    | P5-1_L4_A010       | 378938026   | 56.84     | 343897778 | 50139444     | 14.58        | 0.985633   | 0.994945  | 30683450     | 0.520289     |
|                    | P5-2_L3_A012       | 178567094   | 26.79     | 171375332 | 17934792     | 10.47        | 0.984376   | 0.995371  | 17796608     | 0.301779     |
|                    | P5-3_L2_A012       | 221684686   | 33.25     | 201043102 | 21755324     | 10.82        | 0.969471   | 0.991765  | 17658838     | 0.299442     |
| P1112              | 1112P1-1_L2_A001   | 242329132   | 36.35     | 241067850 | 42208985     | 17.51        | 0.980843   | 0.99616   | 28944875     | 0.49082      |
|                    | 1112P1-2_L2_A002   | 272826982   | 40.92     | 271286216 | 49892042     | 18.39        | 0.983779   | 0.996007  | 30148368     | 0.511225     |
|                    | 1112P2-1_L2_A004   | 394821502   | 59.22     | 392763952 | 69909836     | 17.8         | 0.984606   | 0.996024  | 35274135     | 0.598141     |
|                    | 1112P2-3_L2_A006   | 450490368   | 67.57     | 448532652 | 75045663     | 16.73        | 0.98093    | 0.996022  | 35306024     | 0.598681     |
|                    | 1112P3-1_L2_A007   | 293962202   | 44.09     | 290997588 | 43960227     | 15.11        | 0.978401   | 0.995898  | 22674393     | 0.384487     |
|                    | 1112P3-2_L2_A008   | 265061094   | 39.76     | 263674088 | 48997962     | 18.58        | 0.976825   | 0.996262  | 30833754     | 0.52285      |
|                    | 1112P4-1_L2_A009   | 240535982   | 36.08     | 239191962 | 44134368     | 18.45        | 0.983778   | 0.996105  | 29674868     | 0.503199     |
|                    | 1112P4-2_L2_A010   | 358150206   | 53.72     | 356333106 | 63789129     | 17.9         | 0.98373    | 0.9962    | 33970573     | 0.57603      |
|                    | 1112P5-1_L2_A011   | 292194296   | 43.83     | 290686054 | 50875245     | 17.5         | 0.985337   | 0.996218  | 31442770     | 0.533175     |
| P1113              | 1113P1-1_L4_A001   | 134940296   | 20.24     | 134133872 | 21908545     | 16.33        | 0.976897   | 0.99574   | 20385280     | 0.345675     |
|                    | 1113P1-2_L4_A002   | 395442446   | 59.32     | 393072938 | 62736932     | 15.96        | 0.977719   | 0.995697  | 32777776     | 0.555805     |
|                    | 1113P2-1_L4_A004   | 293259918   | 43.99     | 291596862 | 47267861     | 16.21        | 0.979476   | 0.99572   | 29586224     | 0.501694     |
|                    | 1113P2-2_L4_A005   | 271504624   | 40.73     | 270061644 | 45075982     | 16.69        | 0.98055    | 0.995913  | 29324470     | 0.497252     |
|                    | 1113P3-1_L4_A007   | 265529908   | 39.83     | 264083918 | 46942354     | 17.78        | 0.984474   | 0.996653  | 30008336     | 0.508849     |
|                    | 1113P3-2_L4_A008   | 293202510   | 43.98     | 291322458 | 51260723     | 17.6         | 0.982148   | 0.996525  | 30451029     | 0.516359     |
|                    | 1113P4-1_L4_A009   | 295772280   | 44.37     | 294159104 | 60514368     | 20.57        | 0.985819   | 0.996571  | 33288340     | 0.564471     |
|                    | 1113P4-2_L4_A010   | 444280324   | 66.64     | 440645406 | 76693772     | 17.4         | 0.985238   | 0.996431  | 35868200     | 0.608213     |
|                    | 1113P5-1_L4_A011   | 300581034   | 45.09     | 297996062 | 50636902     | 16.99        | 0.982603   | 0.996554  | 30754303     | 0.521501     |
| 1113P5-2_L4_A012   | 237429208          | 35.61       | 234199370 | 39547488  | 16.89        | 0.983056     | 0.996533   | 27173305  | 0.460781     |              |

|                  |                  |                  |           |           |           |          |          |          |          |            |          |
|------------------|------------------|------------------|-----------|-----------|-----------|----------|----------|----------|----------|------------|----------|
| P1120            | 1113P1-1_L4_A001 | 134940296        | 20.24     | 134133872 | 21908545  | 16.33    | 0.976897 | 0.99574  | 20385280 | 0.345675   |          |
|                  | 1113P1-2_L4_A002 | 395442446        | 59.32     | 393072938 | 62736932  | 15.96    | 0.977719 | 0.995697 | 32777776 | 0.555805   |          |
|                  | 1113P2-1_L4_A004 | 293259918        | 43.99     | 291596862 | 47267861  | 16.21    | 0.979476 | 0.99572  | 29586224 | 0.501694   |          |
|                  | 1113P2-2_L4_A005 | 271504624        | 40.73     | 270061644 | 45075982  | 16.69    | 0.98055  | 0.995913 | 29324470 | 0.497252   |          |
|                  | 1113P3-1_L4_A007 | 265529908        | 39.83     | 264083918 | 46942354  | 17.78    | 0.984474 | 0.996653 | 30008336 | 0.508849   |          |
|                  | 1113P3-2_L4_A008 | 293202510        | 43.98     | 291322458 | 51260723  | 17.6     | 0.982148 | 0.996525 | 30451029 | 0.516359   |          |
|                  | 1113P4-1_L4_A009 | 295772280        | 44.37     | 294159104 | 60514368  | 20.57    | 0.985819 | 0.996571 | 33288340 | 0.564471   |          |
|                  | 1113P4-2_L4_A010 | 444280324        | 66.64     | 440645406 | 76693772  | 17.4     | 0.985238 | 0.996431 | 35868200 | 0.608213   |          |
|                  | 1113P5-1_L4_A011 | 300581034        | 45.09     | 297996062 | 50636902  | 16.99    | 0.982603 | 0.996554 | 30754303 | 0.521501   |          |
|                  | 1113P5-2_L4_A012 | 237429208        | 35.61     | 234199370 | 39547488  | 16.89    | 0.983056 | 0.996533 | 27173305 | 0.460781   |          |
|                  | P0117            | 0117P3-1_L2_A004 | 335771944 | 50.37     | 293869202 | 35255255 | 12       | 0.984836 | 0.995065 | 25601252   | 0.434121 |
|                  |                  | 0117P3-2_L2_A005 | 297634670 | 44.65     | 242853254 | 25966323 | 10.69    | 0.984749 | 0.994775 | 21528474   | 0.36506  |
| 0117P3-3_L2_A006 |                  | 431734528        | 64.76     | 345332060 | 33385454  | 9.67     | 0.984306 | 0.994531 | 23713703 | 0.402109   |          |
| 0117P4-1_L2_A007 |                  | 324550082        | 48.68     | 274836624 | 32343072  | 11.77    | 0.986167 | 0.994355 | 24485619 | 0.415204   |          |
| 0117P4-2_L2_A008 |                  | 433115020        | 64.97     | 356651126 | 37400202  | 10.49    | 0.984414 | 0.994867 | 25932228 | 0.439726   |          |
| 0117P4-3_L2_A009 |                  | 353761964        | 53.06     | 306454906 | 39440724  | 12.87    | 0.986059 | 0.995162 | 27025106 | 0.458264   |          |
| 0117P5-1_L2_A010 |                  | 423548370        | 63.53     | 355336208 | 39960613  | 11.25    | 0.986299 | 0.994806 | 26781800 | 0.454139   |          |
| 0117P5-2_L2_A011 |                  | 354669536        | 53.2      | 306690600 | 34974260  | 11.4     | 0.985873 | 0.994601 | 25735180 | 0.436387   |          |
| 0117P5-3_L2_A012 |                  | 788890           | 0.12      | 657704    | 63440     | 9.65     | 0.979232 | 0.993103 | 109364   | 0.00185778 |          |

**Table S1. Summary of bisulfite-seq data in eight patients.**
